# Supplementary material for: Effect of a Helical Ultrasonic Scaler Tip on Dentin Surface Roughness
Source: Research Square preprint supplement (doi:10.21203/rs.3.rs-8731225/v1), 2026-02-16
Supplement: Supplementary file 1 [file b97563d373a3530b5141e725.docx]

***Graphical Abstract Text***

This in vitro study demonstrates that ultrasonic scaler tip geometry influences dentin surface roughness. A helical ultrasonic scaler tip produced reduced surface alterations compared with a conventional non-helical tip, while showing surface characteristics comparable to hand instrumentation.
